# Supplementary material for: Extensive genetic diversity of Plasmodium vivax dbp-II in Rio de Janeiro Atlantic Forest and Brazilian Amazon Basin: evidence of positive selection
Source: Springer Nature journal article supplement (doi:10.1186/s12936-020-03159-y), 2020-02-19
Supplement: MOESM1 [file 17724864]

PvDBP-II-gene haplotypes in Sao Gabriel da Cachoeira (BA) and in Rio de Janeiro (AF).

| Amazonas                 |                 | 2011       | 2012       | 2013                         | 2014                        | 2015                                                                               | 2016                                                       | 2017                                                                   | 2018                         | Total |
|--------------------------|-----------------|------------|------------|------------------------------|-----------------------------|------------------------------------------------------------------------------------|------------------------------------------------------------|------------------------------------------------------------------------|------------------------------|-------|
| São Gabriel da Cachoeira | n of samples    | 0          | 0          | 0                            | 5                           | 1                                                                                  | 4                                                          | 4                                                                      | 1                            | 15    |
|                          | n of haplotypes | 0          | 0          | 0                            | 5                           | 1                                                                                  | 2                                                          | 4                                                                      | 1                            | 14    |
|                          | haplotype types | 0          | 0          | 0                            | DB03, DB20, DB40, B41, DB58 | DB29                                                                               | DB06 (3 samples)<br>DB08 (1 sample)                        | DB08, DB20, DB21, B72                                                  | DB09                         | 0     |
|                          | Sal 1 Type      | 0          | 0          | 0                            | 0                           | 0                                                                                  | 0                                                          | 0                                                                      | 0                            | 0     |
| AF                       |                 | 2011       | 2012       | 2013                         | 2014                        | 2015                                                                               | 2016                                                       | 2017                                                                   | 2018                         | Total |
|                          | n of samples    | 3          | 3          | 5                            | 0                           | 28                                                                                 | 14                                                         | 19                                                                     | 7                            | 79    |
|                          | n of haplotypes | 3          | 2          | 5                            | 0                           | 14                                                                                 | 10                                                         | 12                                                                     | 5                            | 51    |
|                          | haplotype types | DB12, DB55 | DB12, DB23 | DB01, DB11, DB18, DB23, DB53 | 0                           | DB01, DB03, DB07, DB11, DB17, DB24, DB27, DB34, DB43, DB44, DB45, DB50, DB60, DB86 | DB01, DB03, DB07, DB17, DB24, DB25, DB38, DB46, DB52, DB59 | DB01, DB03, DB07, DB08, DB21, DB26, DB33, DB35, DB36, DB39, DB47, DB61 | DB01, DB04, DB16, DB18, DB80 | 0     |
|                          | Sal 1 Type      | 1          | 0          | 0                            | 0                           | 0                                                                                  | 0                                                          | 0                                                                      | 0                            | 1     |

Haplotype in black bold appear in more than one sample at the same year
