# Supplementary material for: Extensive genetic diversity of Plasmodium vivax dbp-II in Rio de Janeiro Atlantic Forest and Brazilian Amazon Basin: evidence of positive selection
Source: Springer Nature journal article supplement (doi:10.1186/s12936-020-03159-y), 2020-02-19
Supplement: MOESM2 [file 17724864]

DBP\_2705\_Brazil-BA .....  
DBP\_2737\_Brazil-BA .....  
DBP\_2751\_Brazil-BA .....  
DBP\_2773\_Brazil-BA .....  
DBP\_3124\_Brazil-BA .....  
DBP\_3164\_Brazil-BA .....T.....  
DBP\_3260\_Brazil-BA .....T.....  
DBP\_3280\_Brazil-BA .....T.....  
DBP\_3307\_Brazil-BA .....  
DBP\_3311\_Brazil-BA .....T.....  
DBP\_3314\_Brazil-BA .....  
DBP\_3340\_Brazil-BA .....T.....  
DBP\_3404\_Brazil-BA .....T.....  
DBP\_3507\_Brazil-BA .....  
DBP\_3516\_Brazil-BA .....  
DBP\_3530\_Brazil-BA .....  
DBP\_3556\_Brazil-BA .....  
DBP\_3560\_Brazil-BA .....  
DBP\_3569\_Brazil-BA .....  
DBP\_3601\_Brazil-BA .....  
DBP\_3617\_Brazil-BA .....T.....  
DBP\_3661\_Brazil-BA .....  
DBP\_3707\_Brazil-BA .....  
DBP\_3814\_Brazil-BA .....  
DBP\_3842\_Brazil-BA .....  
DBP\_3876\_Brazil-BA .....  
DBP\_3880\_Brazil-BA .....  
DBP\_3908\_Brazil-BA .....  
DBP\_3913\_Brazil-BA .....T.....  
DBP\_3914\_Brazil-BA .....  
DBP\_3937\_Brazil-BA .....T.....  
DBP\_3974\_Brazil-BA .....T.....  
DBP\_3976\_Brazil-BA .....T.....  
DBP\_3998\_Brazil-BA .....  
DBP\_4030\_Brazil-BA .....  
DBP\_4071\_Brazil-BA .....  
DBP\_4109\_Brazil-BA .....  
DBP\_4135\_Brazil-BA .....T.....  
DBP\_1274\_Brazil-AF .....T.....  
DBP\_1347\_Brazil-AF .....  
DBP\_1436\_Brazil-AF .....T.....  
DBP\_1737\_Brazil-AF .....T.....  
DBP\_1652\_Brazil-AF .....T.....T.....G.....  
DBP\_1745\_Brazil-AF .....T.....  
DBP\_1856\_Brazil-AF .....T.....T.....  
DBP\_1906\_Brazil-AF .....T.....  
DBP\_1948\_Brazil-AF .....T.....T.....G.....  
DBP\_1960\_Brazil-AF .....T.....T.....  
DBP\_1961\_Brazil-AF .....T.....T.....G.....  
DBP\_2728\_Brazil-AF .....T.....T.....  
DBP\_2734\_Brazil-AF .....T.....T.....

DBP\_2736\_Brazil-AF .....  
DBP\_2747\_Brazil-AF .....T.....  
DBP\_2752\_Brazil-AF .....T.....T.....  
DBP\_2762\_Brazil-AF .....T.....T.....  
DBP\_2765\_Brazil-AF .....T.....T.....  
DBP\_2769\_Brazil-AF .....T.....T.....  
DBP\_2770\_Brazil-AF .....T.....T.....  
DBP\_2775\_Brazil-AF .....T.....T.....G.....  
DBP\_2779\_Brazil-AF .....T.....T.....  
DBP\_2782\_Brazil-AF .....T.....T.....  
DBP\_2792\_Brazil-AF .....T.....T.....G.....  
DBP\_2793\_Brazil-AF .....T.....T.....G.....  
DBP\_2816\_Brazil-AF .....T.....T.....G.....  
DBP\_2840\_Brazil-AF .....T.....T.....  
DBP\_2859\_Brazil-AF .....T.....T.....  
DBP\_2900\_Brazil-AF .....T.....T.....  
DBP\_2916\_Brazil-AF .....T.....T.....G.....  
DBP\_2923\_Brazil-AF .....T.....T.....  
DBP\_2980\_Brazil-AF .....  
DBP\_2982\_Brazil-AF .....T.....T.....G.....  
DBP\_2983\_Brazil-AF .....G.....  
DBP\_3071\_Brazil-AF .....T.....T.....  
DBP\_3079\_Brazil-AF .....T.....T.....G.....  
DBP\_3084\_Brazil-AF .....T.....T.....  
DBP\_3089\_Brazil-AF .....T.....T.....  
DBP\_3157\_Brazil-AF .....  
DBP\_3276\_Brazil-AF .....  
DBP\_3277\_Brazil-AF .....T.....T.....  
DBP\_3278\_Brazil-AF .....T.....T.....G.....  
DBP\_3284\_Brazil-AF .....T.....T.....  
DBP\_3296\_Brazil-AF .....T.....T.....  
DBP\_3300\_Brazil-AF .....T.....T.....  
DBP\_3310\_Brazil-AF .....T.....T.....  
DBP\_3315\_Brazil-AF .....T.....T.....  
DBP\_3325\_Brazil-AF .....  
DBP\_3334\_Brazil-AF .....T.....T.....G.....  
DBP\_3371\_Brazil-AF .....T.....T.....G.....  
DBP\_3376\_Brazil-AF .....T.....T.....  
DBP\_3379\_Brazil-AF .....T.....T.....  
DBP\_3406\_Brazil-AF .....T.....T.....  
DBP\_3612\_Brazil-AF .....T.....T.....  
DBP\_3613\_Brazil-AF .....T.....T.....  
DBP\_3614\_Brazil-AF .....T.....T.....G.....  
DBP\_3616\_Brazil-AF .....T.....T.....G.....  
DBP\_3630\_Brazil-AF .....T.....T.....  
DBP\_3633\_Brazil-AF .....T.....T.....G.....  
DBP\_3643\_Brazil-AF .....T.....T.....  
DBP\_3659\_Brazil-AF .....T.....T.....  
DBP\_3698\_Brazil-AF .....T.....T.....  
DBP\_3705\_Brazil-AF .....  
DBP\_3722\_Brazil-AF .....T.....T.....

DBP\_3735\_Brazil-AF .....T.....T.....  
 DBP\_3736\_Brazil-AF .....  
 DBP\_3739\_Brazil-AF .....T.....T.....  
 DBP\_3746\_Brazil-AF .....  
 DBP\_3750\_Brazil-AF .....  
 DBP\_3916\_Brazil-AF .....  
 DBP\_3931\_Brazil-AF .....T.....T.....  
 DBP\_3962\_Brazil-AF .....  
 DBP\_4083\_Brazil-AF .....T.....T.....  
 DBP\_4096\_Brazil-AF .....  
 DBP\_4097\_Brazil-AF .....T.....T.....  
 DBP\_4112\_Brazil-AF .....  
 DBP\_4118\_Brazil-AF .....T.....T.....  
 DBP\_4131\_Brazil-AF .....  
 DBP\_4161\_Brazil-AF .....

110 120 130 140 150 160 170 180 190 200  
 PVX\_110810\_|\_Salvador 1 GATGCTGCAG TAGAGGCCGA TTTATTACTT AAGTTGAATA ACTACAGATA TAACAAAGAC TTTTGCAAGG ATATAAGATG GAGTTTGGGA GATTTTGGAG  
 DBP\_07\_Brazil-BA .....  
 DBP\_09\_Brazil-BA .....  
 DBP\_10\_Brazil-BA .....  
 DBP\_11\_Brazil-BA .....  
 DBP\_12\_Brazil-BA .....  
 DBP\_13\_Brazil-BA .....  
 DBP\_14\_Brazil-BA .....  
 DBP\_15\_Brazil-BA .....  
 DBP\_16\_Brazil-BA .....  
 DBP\_17\_Brazil-BA .....  
 DBP\_18\_Brazil-BA .....  
 DBP\_20\_Brazil-BA .....  
 DBP\_21\_Brazil-BA .....  
 DBP\_22\_Brazil-BA .....  
 DBP\_24\_Brazil-BA .....  
 DBP\_26\_Brazil-BA .....  
 DBP\_27\_Brazil-BA .....  
 DBP\_28\_Brazil-BA .....  
 DBP\_29\_Brazil-BA .....  
 DBP\_31\_Brazil-BA .....  
 DBP\_32\_Brazil-BA .....  
 DBP\_33\_Brazil-BA .....  
 DBP\_35\_Brazil-BA .....  
 DBP\_36\_Brazil-BA .....  
 DBP\_37\_Brazil-BA .....  
 DBP\_38\_Brazil-BA .....  
 DBP\_39\_Brazil-BA .....  
 DBP\_40\_Brazil-BA .....  
 DBP\_41\_Brazil-BA .....  
 DBP\_42\_Brazil-BA .....  
 DBP\_43\_Brazil-BA .....  
 DBP\_44\_Brazil-BA .....

DBP\_45\_Brazil-BA .....  
DBP\_46\_Brazil-BA .....  
DBP\_47\_Brazil-BA .....  
DBP\_48\_Brazil-BA .....  
DBP\_49\_Brazil-BA .....  
DBP\_51\_Brazil-BA .....  
DBP\_53\_Brazil-BA .....  
DBP\_54\_Brazil-BA .....  
DBP\_55\_Brazil-BA .....  
DBP\_56\_Brazil-BA .....  
DBP\_57\_Brazil-BA .....  
DBP\_58\_Brazil-BA .....  
DBP\_59\_Brazil-BA .....  
DBP\_1161\_Brazil-BA .....  
DBP\_1182\_Brazil-BA .....  
DBP\_1190\_Brazil-BA .....  
DBP\_1200\_Brazil-BA .....  
DBP\_1209\_Brazil-BA .....T.....  
DBP\_1272\_Brazil-BA .....  
DBP\_1295\_Brazil-BA .....  
DBP\_1320\_Brazil-BA .....  
DBP\_1327\_Brazil-BA .....  
DBP\_1335\_Brazil-BA .....  
DBP\_1340\_Brazil-BA .....  
DBP\_1346\_Brazil-BA .....  
DBP\_1382\_Brazil-BA .....  
DBP\_1428\_Brazil-BA .....T.....  
DBP\_1447\_Brazil-BA .....  
DBP\_1469\_Brazil-BA .....  
DBP\_1473\_Brazil-BA .....  
DBP\_1475\_Brazil-BA .....  
DBP\_1493\_Brazil-BA .....  
DBP\_1532\_Brazil-BA .....  
DBP\_1540\_Brazil-BA .....  
DBP\_1621\_Brazil-BA .....  
DBP\_1627\_Brazil-BA .....  
DBP\_1641\_Brazil-BA .....  
DBP\_1664\_Brazil-BA .....  
DBP\_1741\_Brazil-BA .....  
DBP\_1747\_Brazil-BA .....  
DBP\_1748\_Brazil-BA .....  
DBP\_1777\_Brazil-BA .....  
DBP\_1789\_Brazil-BA .....  
DBP\_1812\_Brazil-BA .....  
DBP\_1824\_Brazil-BA .....  
DBP\_1830\_Brazil-BA .....  
DBP\_1837\_Brazil-BA .....  
DBP\_1853\_Brazil-BA .....  
DBP\_1867\_Brazil-BA .....T.....  
DBP\_1914\_Brazil-BA .....  
DBP\_1874\_Brazil-BA .....

DBP\_2036\_Brazil-BA .....  
DBP\_2159\_Brazil-BA .....  
DBP\_2212\_Brazil-BA .....  
DBP\_2272\_Brazil-BA .....  
DBP\_2327\_Brazil-BA .....T.....  
DBP\_2339\_Brazil-BA .....  
DBP\_2452\_Brazil-BA .....  
DBP\_2462\_Brazil-BA .....  
DBP\_2517\_Brazil-BA .....  
DBP\_2592\_Brazil-BA .....  
DBP\_2600\_Brazil-BA .....  
DBP\_2650\_Brazil-BA .....  
DBP\_2688\_Brazil-BA .....  
DBP\_2695\_Brazil-BA .....  
DBP\_2692\_Brazil-BA .....  
DBP\_2693\_Brazil-BA .....  
DBP\_2705\_Brazil-BA .....  
DBP\_2737\_Brazil-BA .....  
DBP\_2751\_Brazil-BA .....  
DBP\_2773\_Brazil-BA .....  
DBP\_3124\_Brazil-BA .....  
DBP\_3164\_Brazil-BA .....  
DBP\_3260\_Brazil-BA .....  
DBP\_3280\_Brazil-BA .....  
DBP\_3307\_Brazil-BA .....  
DBP\_3311\_Brazil-BA .....  
DBP\_3314\_Brazil-BA .....  
DBP\_3340\_Brazil-BA .....  
DBP\_3404\_Brazil-BA .....  
DBP\_3507\_Brazil-BA .....  
DBP\_3516\_Brazil-BA .....  
DBP\_3530\_Brazil-BA .....T.....  
DBP\_3556\_Brazil-BA .....  
DBP\_3560\_Brazil-BA .....  
DBP\_3569\_Brazil-BA .....  
DBP\_3601\_Brazil-BA .....  
DBP\_3617\_Brazil-BA .....  
DBP\_3661\_Brazil-BA .....T.....  
DBP\_3707\_Brazil-BA .....  
DBP\_3814\_Brazil-BA .....  
DBP\_3842\_Brazil-BA .....T.....  
DBP\_3876\_Brazil-BA .....  
DBP\_3880\_Brazil-BA .....  
DBP\_3908\_Brazil-BA .....  
DBP\_3913\_Brazil-BA .....  
DBP\_3914\_Brazil-BA .....  
DBP\_3937\_Brazil-BA .....  
DBP\_3974\_Brazil-BA .....  
DBP\_3976\_Brazil-BA .....  
DBP\_3998\_Brazil-BA .....  
DBP\_4030\_Brazil-BA .....







DBP\_27\_Brazil-BA .....T.....G.A...T.....A  
DBP\_28\_Brazil-BA .....G.....A  
DBP\_29\_Brazil-BA .....G.....A  
DBP\_31\_Brazil-BA .....G.....  
DBP\_32\_Brazil-BA .....G.....C.....  
DBP\_33\_Brazil-BA .....G.....A  
DBP\_35\_Brazil-BA .....G.....A  
DBP\_36\_Brazil-BA .....G.....  
DBP\_37\_Brazil-BA .....  
DBP\_38\_Brazil-BA .....G.....  
DBP\_39\_Brazil-BA .....G.....A  
DBP\_40\_Brazil-BA .....G.....C.....  
DBP\_41\_Brazil-BA .....G.....A  
DBP\_42\_Brazil-BA .....G.....A  
DBP\_43\_Brazil-BA .....G.....A  
DBP\_44\_Brazil-BA .....G.....A  
DBP\_45\_Brazil-BA .....G.....A  
DBP\_46\_Brazil-BA .....G.....A  
DBP\_47\_Brazil-BA .....G.....C.....  
DBP\_48\_Brazil-BA .....G.....A  
DBP\_49\_Brazil-BA .....G.....C.....  
DBP\_51\_Brazil-BA .....  
DBP\_53\_Brazil-BA .....  
DBP\_54\_Brazil-BA .....G.....A  
DBP\_55\_Brazil-BA .....G.....  
DBP\_56\_Brazil-BA .....G.....C.....  
DBP\_57\_Brazil-BA .....G.....C.....  
DBP\_58\_Brazil-BA .....G.....C.....  
DBP\_59\_Brazil-BA .....G.....C.....  
DBP\_1161\_Brazil-BA .....G.....C.....  
DBP\_1182\_Brazil-BA .....G.....A  
DBP\_1190\_Brazil-BA .....G.....  
DBP\_1200\_Brazil-BA .....G.....C.....  
DBP\_1209\_Brazil-BA .....G.....C.....A.....A  
DBP\_1272\_Brazil-BA .....G.....G.....T.....G.A.C.....A  
DBP\_1295\_Brazil-BA .....G.....  
DBP\_1320\_Brazil-BA .....  
DBP\_1327\_Brazil-BA .....G.....A  
DBP\_1335\_Brazil-BA .....G.....A  
DBP\_1340\_Brazil-BA .....G.....A...T.....  
DBP\_1346\_Brazil-BA .....G.....C.....  
DBP\_1382\_Brazil-BA .....G.....  
DBP\_1428\_Brazil-BA .....G.....G.....A...T.....A  
DBP\_1447\_Brazil-BA .....G.....C.....  
DBP\_1469\_Brazil-BA .....G.....A...T.....  
DBP\_1473\_Brazil-BA .....G.....A...T.....A  
DBP\_1475\_Brazil-BA .....G.....C.....  
DBP\_1493\_Brazil-BA .....G.....T.....G.A...T.....A  
DBP\_1532\_Brazil-BA .....G.....C.....  
DBP\_1540\_Brazil-BA .....G.....A  
DBP\_1621\_Brazil-BA .....G.....C.....

DBP\_1627\_Brazil-BA .....G.....G..C.....  
DBP\_1641\_Brazil-BA .....A.....  
DBP\_1664\_Brazil-BA .....G.....A.....  
DBP\_1741\_Brazil-BA .....G.....G.....  
DBP\_1747\_Brazil-BA .....  
DBP\_1748\_Brazil-BA .....G.....A.....  
DBP\_1777\_Brazil-BA .....  
DBP\_1789\_Brazil-BA .....G.....A.....  
DBP\_1812\_Brazil-BA .....G.....G.....  
DBP\_1824\_Brazil-BA .....  
DBP\_1830\_Brazil-BA .....G.....G.A..T.....  
DBP\_1837\_Brazil-BA .....G.....G..C.....  
DBP\_1853\_Brazil-BA .....G.....G..C.....  
DBP\_1867\_Brazil-BA .....G.....G..C.....  
DBP\_1914\_Brazil-BA .....T.....G.A..T.....A.....  
DBP\_1874\_Brazil-BA .....G.....  
DBP\_2036\_Brazil-BA .....G.....  
DBP\_2159\_Brazil-BA .....  
DBP\_2212\_Brazil-BA .....G.....  
DBP\_2272\_Brazil-BA .....  
DBP\_2327\_Brazil-BA .....G.A..C.....A.....  
DBP\_2339\_Brazil-BA .....G.....  
DBP\_2452\_Brazil-BA .....G.....G.C..T.....  
DBP\_2462\_Brazil-BA .....  
DBP\_2517\_Brazil-BA .....G.....T.....G.....A.....  
DBP\_2592\_Brazil-BA .....G.....G.....A.....  
DBP\_2600\_Brazil-BA .....G.....G.....A.....  
DBP\_2650\_Brazil-BA .....G.....G.....A.....  
DBP\_2688\_Brazil-BA .....G.....G..C.....  
DBP\_2695\_Brazil-BA .....G.....  
DBP\_2692\_Brazil-BA .....G.....  
DBP\_2693\_Brazil-BA .....G.....G.A..T.....  
DBP\_2705\_Brazil-BA .....G.....G.....A.....  
DBP\_2737\_Brazil-BA .....  
DBP\_2751\_Brazil-BA .....G.....A.....  
DBP\_2773\_Brazil-BA .....G.....G..C.....  
DBP\_3124\_Brazil-BA .....G.....G.....A.....  
DBP\_3164\_Brazil-BA .....G.....G.A..T.....  
DBP\_3260\_Brazil-BA .....G.A..T.....  
DBP\_3280\_Brazil-BA .....G.A..T.....  
DBP\_3307\_Brazil-BA .....G.....G..C.....  
DBP\_3311\_Brazil-BA .....G.A..T.....  
DBP\_3314\_Brazil-BA .....G.....G..C.....  
DBP\_3340\_Brazil-BA .....G.....G.A..T.....  
DBP\_3404\_Brazil-BA .....G.....G.A..T.....  
DBP\_3507\_Brazil-BA .....G.....G.....  
DBP\_3516\_Brazil-BA .....G.....A.....  
DBP\_3530\_Brazil-BA .....G.....T.....G.A..T.....A.....  
DBP\_3556\_Brazil-BA .....G.....A.....  
DBP\_3560\_Brazil-BA .....G.....G.....  
DBP\_3569\_Brazil-BA .....G.....G.....A.....

DBP\_3601\_Brazil-BA .....G.....  
 DBP\_3617\_Brazil-BA .....G.....  
 DBP\_3661\_Brazil-BA .....G.....T.....G.A...T...A  
 DBP\_3707\_Brazil-BA .....G.....A  
 DBP\_3814\_Brazil-BA .....T.....  
 DBP\_3842\_Brazil-BA .....G.....T.....G.A...T...A  
 DBP\_3876\_Brazil-BA .....G.....G.....  
 DBP\_3880\_Brazil-BA .....G.....C...A  
 DBP\_3908\_Brazil-BA .....G.....C.....  
 DBP\_3913\_Brazil-BA .....G.....T.....  
 DBP\_3914\_Brazil-BA .....  
 DBP\_3937\_Brazil-BA .....G.....T.....G.A...T...A  
 DBP\_3974\_Brazil-BA .....G.....T.....G.A...T...A  
 DBP\_3976\_Brazil-BA .....G.....T.....G.A...T...A  
 DBP\_3998\_Brazil-BA .....G.....C.....  
 DBP\_4030\_Brazil-BA .....G.A.....  
 DBP\_4071\_Brazil-BA .....  
 DBP\_4109\_Brazil-BA .....  
 DBP\_4135\_Brazil-BA .....T.....G.A...T...A  
 DBP\_1274\_Brazil-AF .....G.....C.....  
 DBP\_1347\_Brazil-AF .....  
 DBP\_1436\_Brazil-AF .....T.....G.A...T...A  
 DBP\_1737\_Brazil-AF .....G.....C.....  
 DBP\_1652\_Brazil-AF .....T.....T.....G.C...T...A  
 DBP\_1745\_Brazil-AF .....G.....C.....  
 DBP\_1856\_Brazil-AF .....G.A...CT...A  
 DBP\_1906\_Brazil-AF .....G.A...CT...A  
 DBP\_1948\_Brazil-AF .....T.....G.C...T...A  
 DBP\_1960\_Brazil-AF .....T.....G.AC...T...A  
 DBP\_1961\_Brazil-AF .....T.....T.....G.C...T...A  
 DBP\_2728\_Brazil-AF .....T.....G.A...CT...A  
 DBP\_2734\_Brazil-AF .....G.....C.....  
 DBP\_2736\_Brazil-AF .....T.....G.A...T...A  
 DBP\_2747\_Brazil-AF .....T.....G.A...CT...A  
 DBP\_2752\_Brazil-AF .....T.....G.A...CT...A  
 DBP\_2762\_Brazil-AF .....T.....G.A...CT...A  
 DBP\_2765\_Brazil-AF .....T.....G.C...T...A  
 DBP\_2769\_Brazil-AF .....T.....G.A...T...A  
 DBP\_2770\_Brazil-AF .....T.....G.A...CT...A  
 DBP\_2775\_Brazil-AF .....T.....G.C...T...A  
 DBP\_2779\_Brazil-AF .....T.....G.A...CT...A  
 DBP\_2782\_Brazil-AF .....T.....G.A...T...A  
 DBP\_2792\_Brazil-AF .....T.....T.....G.C...T...A  
 DBP\_2793\_Brazil-AF .....T.....G.C...T...A  
 DBP\_2816\_Brazil-AF .....T.....G.C...T...A  
 DBP\_2840\_Brazil-AF .....T.....G.A...T...A  
 DBP\_2859\_Brazil-AF .....T.....G.A...CT...A  
 DBP\_2900\_Brazil-AF .....T.....G.A...T...A  
 DBP\_2916\_Brazil-AF .....T.....G.C...T...A  
 DBP\_2923\_Brazil-AF .....T.....G.A...T...A  
 DBP\_2980\_Brazil-AF .....G.....C.....

DBP\_2982\_Brazil-AF ..... T ..... T ..... G.C.T ..... A  
DBP\_2983\_Brazil-AF ..... G ..... T ..... G.C ..... A  
DBP\_3071\_Brazil-AF ..... T ..... G.C.T ..... A  
DBP\_3079\_Brazil-AF ..... T ..... G.C.T ..... A  
DBP\_3084\_Brazil-AF ..... T ..... G.C.T ..... A  
DBP\_3089\_Brazil-AF ..... T ..... G.A.CT ..... A  
DBP\_3157\_Brazil-AF ..... G ..... G.C .....  
DBP\_3276\_Brazil-AF ..... G ..... G.C .....  
DBP\_3277\_Brazil-AF ..... T ..... G.A.T ..... A  
DBP\_3278\_Brazil-AF ..... T ..... G.C.T ..... A  
DBP\_3284\_Brazil-AF ..... T ..... G.A.T ..... A  
DBP\_3296\_Brazil-AF ..... T ..... G.A.CT ..... A  
DBP\_3300\_Brazil-AF ..... T ..... G.A.CT ..... A  
DBP\_3310\_Brazil-AF ..... T ..... G.A.CT ..... A  
DBP\_3315\_Brazil-AF ..... T ..... G.A.CT ..... A  
DBP\_3325\_Brazil-AF ..... G ..... G.C .....  
DBP\_3334\_Brazil-AF ..... T ..... G.C.T ..... A  
DBP\_3371\_Brazil-AF ..... T ..... G.C.T ..... A  
DBP\_3376\_Brazil-AF ..... T ..... G.C.T ..... A  
DBP\_3379\_Brazil-AF ..... T ..... G.C.T ..... A  
DBP\_3406\_Brazil-AF ..... G.A.CT ..... A  
DBP\_3612\_Brazil-AF ..... T ..... G.A.CT ..... A  
DBP\_3613\_Brazil-AF ..... T ..... G.A.CT ..... A  
DBP\_3614\_Brazil-AF ..... T ..... G.C.T ..... A  
DBP\_3616\_Brazil-AF ..... T ..... G.C.T ..... A  
DBP\_3630\_Brazil-AF ..... T ..... G.A.CT ..... A  
DBP\_3633\_Brazil-AF ..... T ..... G.C.T ..... A  
DBP\_3643\_Brazil-AF ..... T ..... G.A.T ..... A  
DBP\_3659\_Brazil-AF ..... T ..... G.A.T ..... A  
DBP\_3698\_Brazil-AF ..... G.A.T .....  
DBP\_3705\_Brazil-AF ..... G ..... A  
DBP\_3722\_Brazil-AF ..... T ..... G.A.CT ..... A  
DBP\_3735\_Brazil-AF ..... T ..... G.A.CT ..... A  
DBP\_3736\_Brazil-AF ..... G ..... G.C .....  
DBP\_3739\_Brazil-AF ..... T ..... G.A.CT ..... A  
DBP\_3746\_Brazil-AF ..... G ..... G.C .....  
DBP\_3750\_Brazil-AF ..... G ..... G.C .....  
DBP\_3916\_Brazil-AF ..... G ..... G.C .....  
DBP\_3931\_Brazil-AF ..... T ..... G.A.T ..... A  
DBP\_3962\_Brazil-AF ..... T ..... G.A.T .....  
DBP\_4083\_Brazil-AF ..... T ..... G.AC.T ..... A  
DBP\_4096\_Brazil-AF ..... G ..... G.C .....  
DBP\_4097\_Brazil-AF ..... T ..... G.A.CT ..... A  
DBP\_4112\_Brazil-AF ..... G ..... G.C .....  
DBP\_4118\_Brazil-AF ..... T ..... G.AC.T ..... A  
DBP\_4131\_Brazil-AF ..... G ..... G.C .....  
DBP\_4161\_Brazil-AF ..... G ..... G.C .....

|                       | 310       | 320        | 330        | 340       | 350        | 360        | 370       | 380        | 390        | 400       |
|-----------------------|-----------|------------|------------|-----------|------------|------------|-----------|------------|------------|-----------|
| PVX_110810_Salvador_1 | TCGTAACAG | TGGTGGGATG | AATCTAAAGC | ACAAATTGG | ACAGCAATGA | TGTACTCAGT | TAAAAAAGA | TTAAAGGGGA | ATTTTATATG | GATTGTAAA |
| DBP_07_Brazil-BA      | .....     | .....      | .A.....    | .....     | .G.....    | .....      | .....     | .....      | .....      | .....     |
| DBP_09_Brazil-BA      | .....     | .....      | .....      | .....     | .....      | .....      | .....     | .A.....    | .....      | .....     |
| DBP_10_Brazil-BA      | .....     | .....      | .....      | .....     | .....      | .....      | .....     | .....      | .....      | .....     |
| DBP_11_Brazil-BA      | .....     | .....      | .....      | .....     | .....      | .....      | .....     | .....      | .....      | .....     |
| DBP_12_Brazil-BA      | .....     | .....      | .A.....    | .....     | .G.....    | .....      | .....     | .....      | .....      | .....     |
| DBP_13_Brazil-BA      | .....     | .....      | .....      | .....     | .....      | .....      | .....     | .....      | .....      | .....     |
| DBP_14_Brazil-BA      | .....     | .....      | .....      | .....     | .....      | .....      | .....     | .....      | .....      | .....     |
| DBP_15_Brazil-BA      | .....     | .....      | .....      | .....     | .....      | .....      | .....     | .A.....    | .....      | .....     |
| DBP_16_Brazil-BA      | .....     | .....      | .A.....    | .....     | .G.....    | .....      | .....     | .....      | .....      | .....     |
| DBP_17_Brazil-BA      | .....     | .....      | .....      | .....     | .....      | .....      | .....     | .A.....    | .....      | .....     |
| DBP_18_Brazil-BA      | .....     | .....      | .....      | .....     | .....      | .....      | .....     | .....      | .....      | .....     |
| DBP_20_Brazil-BA      | .....     | .....      | .....      | .....     | .....      | .....      | .....     | .....      | .....      | .....     |
| DBP_21_Brazil-BA      | .....     | .....      | .....      | .....     | .....      | .....      | .....     | .....      | .....      | .....     |
| DBP_22_Brazil-BA      | .....     | .....      | .....      | .....     | .....      | .....      | .....     | .....      | .....      | .....     |
| DBP_24_Brazil-BA      | .....     | .....      | .....      | .....     | .....      | .....      | .....     | .A.....    | .....      | .....     |
| DBP_26_Brazil-BA      | .....     | .....      | .....      | .....     | .....      | .....      | .....     | .A.....    | .....      | .....     |
| DBP_27_Brazil-BA      | .....     | .....      | .A.....    | .....     | .G.....    | .....      | .....     | .....      | .....      | .....     |
| DBP_28_Brazil-BA      | .....     | .....      | .....      | .....     | .....      | .....      | .....     | .....      | .....      | .....     |
| DBP_29_Brazil-BA      | .....     | .....      | .....      | .....     | .....      | .....      | .....     | .....      | .....      | .....     |
| DBP_31_Brazil-BA      | .....     | .....      | .....      | .....     | .....      | .....      | .....     | .A.....    | .....      | .....     |
| DBP_32_Brazil-BA      | .....     | .....      | .....      | .....     | .....      | .....      | .....     | .A.....    | .....      | .....     |
| DBP_33_Brazil-BA      | .....     | .....      | .....      | .....     | .....      | .....      | .....     | .....      | .....      | .....     |
| DBP_35_Brazil-BA      | .....     | .....      | .....      | .....     | .....      | .....      | .....     | .....      | .....      | .....     |
| DBP_36_Brazil-BA      | .....     | .....      | .....      | .....     | .....      | .....      | .....     | .....      | .....      | .....     |
| DBP_37_Brazil-BA      | .....     | .....      | .....      | .....     | .....      | .....      | .....     | .....      | .....      | .....     |
| DBP_38_Brazil-BA      | .....     | .....      | .....      | .....     | .....      | .....      | .....     | .....      | .....      | .....     |
| DBP_39_Brazil-BA      | .....     | .....      | .....      | .....     | .....      | .....      | .....     | .....      | .....      | .....     |
| DBP_40_Brazil-BA      | .....     | .....      | .....      | .....     | .....      | .....      | .....     | .A.....    | .....      | .....     |
| DBP_41_Brazil-BA      | .....     | .....      | .....      | .....     | .....      | .....      | .....     | .....      | .....      | .....     |
| DBP_42_Brazil-BA      | .....     | .....      | .....      | .....     | .....      | .....      | .....     | .....      | .....      | .....     |
| DBP_43_Brazil-BA      | .....     | .....      | .....      | .....     | .....      | .....      | .....     | .....      | .....      | .....     |
| DBP_44_Brazil-BA      | .....     | .....      | .....      | .....     | .....      | .....      | .....     | .....      | .....      | .....     |
| DBP_45_Brazil-BA      | .....     | .....      | .....      | .....     | .....      | .....      | .....     | .....      | .....      | .....     |
| DBP_46_Brazil-BA      | .....     | .....      | .....      | .....     | .....      | .....      | .....     | .....      | .....      | .....     |
| DBP_47_Brazil-BA      | .....     | .....      | .....      | .....     | .....      | .....      | .....     | .A.....    | .....      | .....     |
| DBP_48_Brazil-BA      | .....     | .....      | .....      | .....     | .....      | .....      | .....     | .....      | .....      | .....     |
| DBP_49_Brazil-BA      | .....     | .....      | .....      | .....     | .....      | .....      | .....     | .A.....    | .....      | .....     |
| DBP_51_Brazil-BA      | .....     | .....      | .....      | .....     | .....      | .....      | .....     | .A.....    | .....      | .....     |
| DBP_53_Brazil-BA      | .....     | .....      | .....      | .....     | .....      | .....      | .....     | .A.....    | .....      | .....     |
| DBP_54_Brazil-BA      | .....     | .....      | .....      | .....     | .....      | .....      | .....     | .....      | .....      | .....     |
| DBP_55_Brazil-BA      | .....     | .....      | .....      | .....     | .....      | .....      | .....     | .....      | .....      | .....     |
| DBP_56_Brazil-BA      | .....     | .....      | .....      | .....     | .....      | .....      | .....     | .....      | .....      | .....     |
| DBP_57_Brazil-BA      | .....     | .....      | .....      | .....     | .....      | .....      | .....     | .A.....    | .....      | .....     |
| DBP_58_Brazil-BA      | .....     | .....      | .....      | .....     | .....      | .....      | .....     | .A.....    | .....      | .....     |
| DBP_59_Brazil-BA      | .....     | .....      | .....      | .....     | .....      | .....      | .....     | .A.....    | .....      | .....     |
| DBP_1161_Brazil-BA    | .....     | .....      | .....      | .....     | .....      | .....      | .....     | .A.....    | .....      | .....     |
| DBP_1182_Brazil-BA    | .....     | .....      | .....      | .....     | .....      | .....      | .....     | .....      | .....      | .....     |
| DBP_1190_Brazil-BA    | .....     | .....      | .....      | .....     | .....      | .....      | .....     | .A.....    | .G.....    | .....     |

DBP\_1200\_Brazil-BA .....  
DBP\_1209\_Brazil-BA .....A.....  
DBP\_1272\_Brazil-BA .....  
DBP\_1295\_Brazil-BA .....A.....G.....  
DBP\_1320\_Brazil-BA .....  
DBP\_1327\_Brazil-BA .....  
DBP\_1335\_Brazil-BA .....  
DBP\_1340\_Brazil-BA .....A.....  
DBP\_1346\_Brazil-BA .....A.....  
DBP\_1382\_Brazil-BA .....A.....G.....  
DBP\_1428\_Brazil-BA .....A.....  
DBP\_1447\_Brazil-BA .....A.....  
DBP\_1469\_Brazil-BA .....  
DBP\_1473\_Brazil-BA .....  
DBP\_1475\_Brazil-BA .....A.....G.....  
DBP\_1493\_Brazil-BA .....  
DBP\_1532\_Brazil-BA .....A.....  
DBP\_1540\_Brazil-BA .....  
DBP\_1621\_Brazil-BA .....A.....  
DBP\_1627\_Brazil-BA .....A.....  
DBP\_1641\_Brazil-BA .....  
DBP\_1664\_Brazil-BA .....  
DBP\_1741\_Brazil-BA .....A.....G.....  
DBP\_1747\_Brazil-BA .....  
DBP\_1748\_Brazil-BA .....  
DBP\_1777\_Brazil-BA .....  
DBP\_1789\_Brazil-BA .....  
DBP\_1812\_Brazil-BA .....A.....G.....  
DBP\_1824\_Brazil-BA .....A.....  
DBP\_1830\_Brazil-BA .....A.....  
DBP\_1837\_Brazil-BA .....A.....  
DBP\_1853\_Brazil-BA .....A.....  
DBP\_1867\_Brazil-BA .....A.....  
DBP\_1914\_Brazil-BA .....A.....G.....  
DBP\_1874\_Brazil-BA .....A.....G.....  
DBP\_2036\_Brazil-BA .....A.....G.....  
DBP\_2159\_Brazil-BA .....  
DBP\_2212\_Brazil-BA .....A.....  
DBP\_2272\_Brazil-BA .....  
DBP\_2327\_Brazil-BA .....G.....  
DBP\_2339\_Brazil-BA .....  
DBP\_2452\_Brazil-BA .....  
DBP\_2462\_Brazil-BA .....  
DBP\_2517\_Brazil-BA .....A.....G.....  
DBP\_2592\_Brazil-BA .....  
DBP\_2600\_Brazil-BA .....  
DBP\_2650\_Brazil-BA .....  
DBP\_2688\_Brazil-BA .....A.....  
DBP\_2695\_Brazil-BA .....  
DBP\_2692\_Brazil-BA .....  
DBP\_2693\_Brazil-BA .....A.....

DBP\_2705\_Brazil-BA .....  
DBP\_2737\_Brazil-BA .....  
DBP\_2751\_Brazil-BA .....  
DBP\_2773\_Brazil-BA .....A.....  
DBP\_3124\_Brazil-BA .....  
DBP\_3164\_Brazil-BA .....A.....  
DBP\_3260\_Brazil-BA .....A.....  
DBP\_3280\_Brazil-BA .....A.....  
DBP\_3307\_Brazil-BA .....A.....  
DBP\_3311\_Brazil-BA .....A.....  
DBP\_3314\_Brazil-BA .....A.....  
DBP\_3340\_Brazil-BA .....A.....  
DBP\_3404\_Brazil-BA .....A.....  
DBP\_3507\_Brazil-BA .....A.....G.....  
DBP\_3516\_Brazil-BA .....  
DBP\_3530\_Brazil-BA .....A.....  
DBP\_3556\_Brazil-BA .....  
DBP\_3560\_Brazil-BA .....A.....G.....  
DBP\_3569\_Brazil-BA .....  
DBP\_3601\_Brazil-BA .....  
DBP\_3617\_Brazil-BA .....A.....G.....  
DBP\_3661\_Brazil-BA .....A.....  
DBP\_3707\_Brazil-BA .....  
DBP\_3814\_Brazil-BA .....  
DBP\_3842\_Brazil-BA .....A.....  
DBP\_3876\_Brazil-BA .....A.....G.....  
DBP\_3880\_Brazil-BA .....  
DBP\_3908\_Brazil-BA .....A.....  
DBP\_3913\_Brazil-BA .....A.....  
DBP\_3914\_Brazil-BA .....  
DBP\_3937\_Brazil-BA .....A.....  
DBP\_3974\_Brazil-BA .....A.....  
DBP\_3976\_Brazil-BA .....A.....  
DBP\_3998\_Brazil-BA .....  
DBP\_4030\_Brazil-BA .....  
DBP\_4071\_Brazil-BA .....A.....  
DBP\_4109\_Brazil-BA .....A.....  
DBP\_4135\_Brazil-BA .....A.....G.....  
DBP\_1274\_Brazil-AF .....A.....  
DBP\_1347\_Brazil-AF .....  
DBP\_1436\_Brazil-AF .....A.....G.....  
DBP\_1737\_Brazil-AF .....A.....  
DBP\_1652\_Brazil-AF .....G.....C.....G.....  
DBP\_1745\_Brazil-AF .....A.....  
DBP\_1856\_Brazil-AF .....G.....C.....  
DBP\_1906\_Brazil-AF .....G.....C.....  
DBP\_1948\_Brazil-AF .....G.....C.....C.....  
DBP\_1960\_Brazil-AF .....G.....C.....  
DBP\_1961\_Brazil-AF .....G.....C.....G.....  
DBP\_2728\_Brazil-AF .....G.....C.....  
DBP\_2734\_Brazil-AF .....A.....





DBP\_3735\_Brazil-AF .....G.....C.....  
 DBP\_3736\_Brazil-AF .....A.....  
 DBP\_3739\_Brazil-AF .....G.....C.....  
 DBP\_3746\_Brazil-AF .....A.....  
 DBP\_3750\_Brazil-AF .....A.....  
 DBP\_3916\_Brazil-AF .....  
 DBP\_3931\_Brazil-AF .....G.....C.....C.....  
 DBP\_3962\_Brazil-AF .....  
 DBP\_4083\_Brazil-AF .....G.....C.....  
 DBP\_4096\_Brazil-AF .....A.....  
 DBP\_4097\_Brazil-AF .....G.....C.....  
 DBP\_4112\_Brazil-AF .....A.....  
 DBP\_4118\_Brazil-AF .....G.....C.....  
 DBP\_4131\_Brazil-AF .....A.....  
 DBP\_4161\_Brazil-AF .....C.....A.....

410 420 430 440 450 460 470 480 490 500  
 PVX\_110810\_|\_Salvador 1 TTAATGTTG CGGTAAATAT AGAACCGCAG ATATATAGAT GGATTCGAGA ATGGGGAAGG GATTACGTGT CAGAATTGCC CACAGAAGTG CAAAAACTGA  
 DBP\_07\_Brazil-BA A.....  
 DBP\_09\_Brazil-BA A.....C.....  
 DBP\_10\_Brazil-BA A.....C.....  
 DBP\_11\_Brazil-BA .....  
 DBP\_12\_Brazil-BA A.....  
 DBP\_13\_Brazil-BA .....  
 DBP\_14\_Brazil-BA .....  
 DBP\_15\_Brazil-BA A.....C.....  
 DBP\_16\_Brazil-BA A.....  
 DBP\_17\_Brazil-BA A.....C.....  
 DBP\_18\_Brazil-BA .....  
 DBP\_20\_Brazil-BA .....  
 DBP\_21\_Brazil-BA .....  
 DBP\_22\_Brazil-BA .....  
 DBP\_24\_Brazil-BA A.....C.....  
 DBP\_26\_Brazil-BA A.....C.....  
 DBP\_27\_Brazil-BA A.....  
 DBP\_28\_Brazil-BA .....  
 DBP\_29\_Brazil-BA .....  
 DBP\_31\_Brazil-BA A.....C.....  
 DBP\_32\_Brazil-BA A.....C.....  
 DBP\_33\_Brazil-BA .....  
 DBP\_35\_Brazil-BA .....  
 DBP\_36\_Brazil-BA .....C.....  
 DBP\_37\_Brazil-BA .....  
 DBP\_38\_Brazil-BA .....C.....  
 DBP\_39\_Brazil-BA .....  
 DBP\_40\_Brazil-BA A.....C.....  
 DBP\_41\_Brazil-BA .....  
 DBP\_42\_Brazil-BA .....  
 DBP\_43\_Brazil-BA .....  
 DBP\_44\_Brazil-BA .....

DBP\_45\_Brazil-BA .....  
 DBP\_46\_Brazil-BA .....  
 DBP\_47\_Brazil-BA A.....C  
 DBP\_48\_Brazil-BA .....  
 DBP\_49\_Brazil-BA A.....C  
 DBP\_51\_Brazil-BA A.....C  
 DBP\_53\_Brazil-BA A.....C  
 DBP\_54\_Brazil-BA .....  
 DBP\_55\_Brazil-BA A.....  
 DBP\_56\_Brazil-BA .....  
 DBP\_57\_Brazil-BA .....C  
 DBP\_58\_Brazil-BA .....  
 DBP\_59\_Brazil-BA A.....C .....C  
 DBP\_1161\_Brazil-BA A.....  
 DBP\_1182\_Brazil-BA .....  
 DBP\_1190\_Brazil-BA A.....C  
 DBP\_1200\_Brazil-BA A.....C  
 DBP\_1209\_Brazil-BA A.....  
 DBP\_1272\_Brazil-BA .....  
 DBP\_1295\_Brazil-BA A.....C  
 DBP\_1320\_Brazil-BA .....  
 DBP\_1327\_Brazil-BA .....  
 DBP\_1335\_Brazil-BA .....  
 DBP\_1340\_Brazil-BA A.....C  
 DBP\_1346\_Brazil-BA A.....C  
 DBP\_1382\_Brazil-BA A.....C  
 DBP\_1428\_Brazil-BA A.....C  
 DBP\_1447\_Brazil-BA A.....C .....C  
 DBP\_1469\_Brazil-BA .....C  
 DBP\_1473\_Brazil-BA .....  
 DBP\_1475\_Brazil-BA A.....C .....C  
 DBP\_1493\_Brazil-BA .....  
 DBP\_1532\_Brazil-BA A.....C  
 DBP\_1540\_Brazil-BA .....  
 DBP\_1621\_Brazil-BA A.....C .....C  
 DBP\_1627\_Brazil-BA A.....C  
 DBP\_1641\_Brazil-BA .....  
 DBP\_1664\_Brazil-BA .....  
 DBP\_1741\_Brazil-BA A.....C  
 DBP\_1747\_Brazil-BA .....  
 DBP\_1748\_Brazil-BA .....  
 DBP\_1777\_Brazil-BA .....  
 DBP\_1789\_Brazil-BA .....  
 DBP\_1812\_Brazil-BA A.....C  
 DBP\_1824\_Brazil-BA A.....C .....C  
 DBP\_1830\_Brazil-BA A.....C .....C  
 DBP\_1837\_Brazil-BA A.....C .....C  
 DBP\_1853\_Brazil-BA A.....C .....C  
 DBP\_1867\_Brazil-BA A.....C  
 DBP\_1914\_Brazil-BA A.....  
 DBP\_1874\_Brazil-BA A.....C

DBP\_2036\_Brazil-BA A.....  
DBP\_2159\_Brazil-BA .....  
DBP\_2212\_Brazil-BA A.....C  
DBP\_2272\_Brazil-BA .....  
DBP\_2327\_Brazil-BA A.....  
DBP\_2339\_Brazil-BA .....  
DBP\_2452\_Brazil-BA A.....C  
DBP\_2462\_Brazil-BA .....  
DBP\_2517\_Brazil-BA A.....C  
DBP\_2592\_Brazil-BA .....  
DBP\_2600\_Brazil-BA .....  
DBP\_2650\_Brazil-BA A.....C  
DBP\_2688\_Brazil-BA A.....C  
DBP\_2695\_Brazil-BA .....  
DBP\_2692\_Brazil-BA .....C  
DBP\_2693\_Brazil-BA A.....C  
DBP\_2705\_Brazil-BA .....  
DBP\_2737\_Brazil-BA .....  
DBP\_2751\_Brazil-BA .....  
DBP\_2773\_Brazil-BA A.....C  
DBP\_3124\_Brazil-BA .....C  
DBP\_3164\_Brazil-BA A.....C  
DBP\_3260\_Brazil-BA A.....C  
DBP\_3280\_Brazil-BA A.....C  
DBP\_3307\_Brazil-BA A.....C  
DBP\_3311\_Brazil-BA A.....C  
DBP\_3314\_Brazil-BA A.....C  
DBP\_3340\_Brazil-BA A.....C  
DBP\_3404\_Brazil-BA A.....C  
DBP\_3507\_Brazil-BA A.....C  
DBP\_3516\_Brazil-BA .....  
DBP\_3530\_Brazil-BA A.....C  
DBP\_3556\_Brazil-BA .....  
DBP\_3560\_Brazil-BA A.....C  
DBP\_3569\_Brazil-BA .....  
DBP\_3601\_Brazil-BA .....  
DBP\_3617\_Brazil-BA A.....C  
DBP\_3661\_Brazil-BA A.....C  
DBP\_3707\_Brazil-BA .....  
DBP\_3814\_Brazil-BA A.....C  
DBP\_3842\_Brazil-BA A.....C  
DBP\_3876\_Brazil-BA .....C  
DBP\_3880\_Brazil-BA .....C  
DBP\_3908\_Brazil-BA A.....C  
DBP\_3913\_Brazil-BA A.....C  
DBP\_3914\_Brazil-BA .....  
DBP\_3937\_Brazil-BA A.....C  
DBP\_3974\_Brazil-BA A.....C  
DBP\_3976\_Brazil-BA A.....C  
DBP\_3998\_Brazil-BA A.....C  
DBP\_4030\_Brazil-BA .....

DBP\_4071\_Brazil-BA A..... C .....  
DBP\_4109\_Brazil-BA A..... C ..... C.....  
DBP\_4135\_Brazil-BA A..... C .....  
DBP\_1274\_Brazil-AF A..... C .....  
DBP\_1347\_Brazil-AF .....  
DBP\_1436\_Brazil-AF A.....  
DBP\_1737\_Brazil-AF A..... C .....  
DBP\_1652\_Brazil-AF A.....  
DBP\_1745\_Brazil-AF A..... C .....  
DBP\_1856\_Brazil-AF A.....  
DBP\_1906\_Brazil-AF A.....  
DBP\_1948\_Brazil-AF A.....  
DBP\_1960\_Brazil-AF A.....  
DBP\_1961\_Brazil-AF A.....  
DBP\_2728\_Brazil-AF A.....  
DBP\_2734\_Brazil-AF A..... C .....  
DBP\_2736\_Brazil-AF A.....  
DBP\_2747\_Brazil-AF A.....  
DBP\_2752\_Brazil-AF A.....  
DBP\_2762\_Brazil-AF A.....  
DBP\_2765\_Brazil-AF A.....  
DBP\_2769\_Brazil-AF A.....  
DBP\_2770\_Brazil-AF A.....  
DBP\_2775\_Brazil-AF A.....  
DBP\_2779\_Brazil-AF A.....  
DBP\_2782\_Brazil-AF A.....  
DBP\_2792\_Brazil-AF A.....  
DBP\_2793\_Brazil-AF A.....  
DBP\_2816\_Brazil-AF A.....  
DBP\_2840\_Brazil-AF A.....  
DBP\_2859\_Brazil-AF A.....  
DBP\_2900\_Brazil-AF A.....  
DBP\_2916\_Brazil-AF A.....  
DBP\_2923\_Brazil-AF A.....  
DBP\_2980\_Brazil-AF A..... C .....  
DBP\_2982\_Brazil-AF A.....  
DBP\_2983\_Brazil-AF A..... C .....  
DBP\_3071\_Brazil-AF A.....  
DBP\_3079\_Brazil-AF A.....  
DBP\_3084\_Brazil-AF A.....  
DBP\_3089\_Brazil-AF A.....  
DBP\_3157\_Brazil-AF A..... C .....  
DBP\_3276\_Brazil-AF A..... C .....  
DBP\_3277\_Brazil-AF A.....  
DBP\_3278\_Brazil-AF A.....  
DBP\_3284\_Brazil-AF A.....  
DBP\_3296\_Brazil-AF A.....  
DBP\_3300\_Brazil-AF A.....  
DBP\_3310\_Brazil-AF A.....  
DBP\_3315\_Brazil-AF A.....  
DBP\_3325\_Brazil-AF A..... C .....

DBP\_3334\_Brazil-AF A.....  
DBP\_3371\_Brazil-AF A.....  
DBP\_3376\_Brazil-AF A.....  
DBP\_3379\_Brazil-AF A.....  
DBP\_3406\_Brazil-AF A.....  
DBP\_3612\_Brazil-AF A.....  
DBP\_3613\_Brazil-AF A.....  
DBP\_3614\_Brazil-AF A.....  
DBP\_3616\_Brazil-AF A.....  
DBP\_3630\_Brazil-AF A.....  
DBP\_3633\_Brazil-AF A.....  
DBP\_3643\_Brazil-AF A.....  
DBP\_3659\_Brazil-AF A.....  
DBP\_3698\_Brazil-AF A.....  
DBP\_3705\_Brazil-AF .....

DBP\_3722\_Brazil-AF A.....  
DBP\_3735\_Brazil-AF A.....  
DBP\_3736\_Brazil-AF A.....C  
DBP\_3739\_Brazil-AF A.....  
DBP\_3746\_Brazil-AF A.....C  
DBP\_3750\_Brazil-AF A.....C  
DBP\_3916\_Brazil-AF A.....C  
DBP\_3931\_Brazil-AF A.....  
DBP\_3962\_Brazil-AF A.....  
DBP\_4083\_Brazil-AF A.....  
DBP\_4096\_Brazil-AF A.....C  
DBP\_4097\_Brazil-AF A.....  
DBP\_4112\_Brazil-AF A.....C  
DBP\_4118\_Brazil-AF A.....  
DBP\_4131\_Brazil-AF A.....C  
DBP\_4161\_Brazil-AF A.....C







DBP\_2705\_Brazil-BA .....  
DBP\_2737\_Brazil-BA .....  
DBP\_2751\_Brazil-BA .....  
DBP\_2773\_Brazil-BA .....  
DBP\_3124\_Brazil-BA .....  
DBP\_3164\_Brazil-BA .....  
DBP\_3260\_Brazil-BA .....  
DBP\_3280\_Brazil-BA .....  
DBP\_3307\_Brazil-BA .....  
DBP\_3311\_Brazil-BA .....  
DBP\_3314\_Brazil-BA .....  
DBP\_3340\_Brazil-BA .....  
DBP\_3404\_Brazil-BA .....  
DBP\_3507\_Brazil-BA .....  
DBP\_3516\_Brazil-BA .....  
DBP\_3530\_Brazil-BA .....  
DBP\_3556\_Brazil-BA .....  
DBP\_3560\_Brazil-BA .....  
DBP\_3569\_Brazil-BA .....  
DBP\_3601\_Brazil-BA .....  
DBP\_3617\_Brazil-BA .....  
DBP\_3661\_Brazil-BA .....  
DBP\_3707\_Brazil-BA .....  
DBP\_3814\_Brazil-BA .....  
DBP\_3842\_Brazil-BA .....  
DBP\_3876\_Brazil-BA .....  
DBP\_3880\_Brazil-BA .....  
DBP\_3908\_Brazil-BA .....  
DBP\_3913\_Brazil-BA .....  
DBP\_3914\_Brazil-BA .....  
DBP\_3937\_Brazil-BA .....  
DBP\_3974\_Brazil-BA .....  
DBP\_3976\_Brazil-BA .....  
DBP\_3998\_Brazil-BA .....  
DBP\_4030\_Brazil-BA .....  
DBP\_4071\_Brazil-BA .....  
DBP\_4109\_Brazil-BA .....  
DBP\_4135\_Brazil-BA .....  
DBP\_1274\_Brazil-AF .....  
DBP\_1347\_Brazil-AF .....  
DBP\_1436\_Brazil-AF .....  
DBP\_1737\_Brazil-AF .....  
DBP\_1652\_Brazil-AF .....  
DBP\_1745\_Brazil-AF .....  
DBP\_1856\_Brazil-AF .....  
DBP\_1906\_Brazil-AF .....  
DBP\_1948\_Brazil-AF .....  
DBP\_1960\_Brazil-AF .....  
DBP\_1961\_Brazil-AF .....  
DBP\_2728\_Brazil-AF .....  
DBP\_2734\_Brazil-AF .....

DBP\_2736\_Brazil-AF .....  
DBP\_2747\_Brazil-AF .....  
DBP\_2752\_Brazil-AF .....  
DBP\_2762\_Brazil-AF .....  
DBP\_2765\_Brazil-AF .....  
DBP\_2769\_Brazil-AF .....  
DBP\_2770\_Brazil-AF .....  
DBP\_2775\_Brazil-AF .....  
DBP\_2779\_Brazil-AF .....  
DBP\_2782\_Brazil-AF .....  
DBP\_2792\_Brazil-AF .....  
DBP\_2793\_Brazil-AF .....  
DBP\_2816\_Brazil-AF .....  
DBP\_2840\_Brazil-AF .....  
DBP\_2859\_Brazil-AF .....  
DBP\_2900\_Brazil-AF .....  
DBP\_2916\_Brazil-AF .....  
DBP\_2923\_Brazil-AF .....  
DBP\_2980\_Brazil-AF .....  
DBP\_2982\_Brazil-AF .....  
DBP\_2983\_Brazil-AF .....  
DBP\_3071\_Brazil-AF .....  
DBP\_3079\_Brazil-AF .....  
DBP\_3084\_Brazil-AF .....  
DBP\_3089\_Brazil-AF .....  
DBP\_3157\_Brazil-AF .....  
DBP\_3276\_Brazil-AF .....  
DBP\_3277\_Brazil-AF .....  
DBP\_3278\_Brazil-AF .....  
DBP\_3284\_Brazil-AF .....  
DBP\_3296\_Brazil-AF .....  
DBP\_3300\_Brazil-AF .....  
DBP\_3310\_Brazil-AF .....  
DBP\_3315\_Brazil-AF .....  
DBP\_3325\_Brazil-AF .....  
DBP\_3334\_Brazil-AF .....  
DBP\_3371\_Brazil-AF .....  
DBP\_3376\_Brazil-AF .....  
DBP\_3379\_Brazil-AF .....  
DBP\_3406\_Brazil-AF .....  
DBP\_3612\_Brazil-AF .....  
DBP\_3613\_Brazil-AF .....  
DBP\_3614\_Brazil-AF .....  
DBP\_3616\_Brazil-AF .....  
DBP\_3630\_Brazil-AF .....  
DBP\_3633\_Brazil-AF .....  
DBP\_3643\_Brazil-AF .....  
DBP\_3659\_Brazil-AF .....  
DBP\_3698\_Brazil-AF .....  
DBP\_3705\_Brazil-AF .....  
DBP\_3722\_Brazil-AF .....  
G







DBP\_4071\_Brazil-BA .....A.....  
DBP\_4109\_Brazil-BA .....  
DBP\_4135\_Brazil-BA .....  
DBP\_1274\_Brazil-AF .....A.....  
DBP\_1347\_Brazil-AF .....  
DBP\_1436\_Brazil-AF .....  
DBP\_1737\_Brazil-AF .....A.....  
DBP\_1652\_Brazil-AF .....A.....  
DBP\_1745\_Brazil-AF .....A.....  
DBP\_1856\_Brazil-AF .....  
DBP\_1906\_Brazil-AF .....  
DBP\_1948\_Brazil-AF .....  
DBP\_1960\_Brazil-AF .....  
DBP\_1961\_Brazil-AF .....A.....  
DBP\_2728\_Brazil-AF .....  
DBP\_2734\_Brazil-AF .....  
DBP\_2736\_Brazil-AF .....  
DBP\_2747\_Brazil-AF .....  
DBP\_2752\_Brazil-AF .....  
DBP\_2762\_Brazil-AF .....  
DBP\_2765\_Brazil-AF .....  
DBP\_2769\_Brazil-AF .....  
DBP\_2770\_Brazil-AF .....  
DBP\_2775\_Brazil-AF .....  
DBP\_2779\_Brazil-AF .....  
DBP\_2782\_Brazil-AF .....  
DBP\_2792\_Brazil-AF .....  
DBP\_2793\_Brazil-AF .....  
DBP\_2816\_Brazil-AF .....  
DBP\_2840\_Brazil-AF .....  
DBP\_2859\_Brazil-AF .....  
DBP\_2900\_Brazil-AF .....  
DBP\_2916\_Brazil-AF .....  
DBP\_2923\_Brazil-AF .....  
DBP\_2980\_Brazil-AF .....  
DBP\_2982\_Brazil-AF .....  
DBP\_2983\_Brazil-AF .....  
DBP\_3071\_Brazil-AF .....  
DBP\_3079\_Brazil-AF .....  
DBP\_3084\_Brazil-AF .....  
DBP\_3089\_Brazil-AF .....  
DBP\_3157\_Brazil-AF .....  
DBP\_3276\_Brazil-AF .....  
DBP\_3277\_Brazil-AF .....  
DBP\_3278\_Brazil-AF .....  
DBP\_3284\_Brazil-AF .....  
DBP\_3296\_Brazil-AF .....A.....  
DBP\_3300\_Brazil-AF .....  
DBP\_3310\_Brazil-AF .....  
DBP\_3315\_Brazil-AF .....  
DBP\_3325\_Brazil-AF .....
