# Supplementary material for: Extensive genetic diversity of Plasmodium vivax dbp-II in Rio de Janeiro Atlantic Forest and Brazilian Amazon Basin: evidence of positive selection
Source: Springer Nature journal article supplement (doi:10.1186/s12936-020-03159-y), 2020-02-19
Supplement: MOESM3 [file 17724864]

| Identifier | Haplotypes                                                        | N of polymorphic sites |
|------------|-------------------------------------------------------------------|------------------------|
| DB01       | YSIFK <b>NR</b> GK <b>THSR</b> NNIIWQQI                           | 11                     |
| DB02       | NRILKNR <b>GEK</b> HSTKNILWQQ <b>K</b>                            | 3                      |
| DB03       | NRIL <b>ENR</b> <b>GEQR</b> STK <b>KIIR</b> QQI                   | 6                      |
| DB04       | NRIL <b>ENR</b> <b>GEQR</b> STK <b>KIIR</b> QQ <b>K</b>           | 7                      |
| DB05       | NRILKNR <b>GEK</b> HSTKNILWQQI                                    | 2                      |
| DB06       | NSIL <b>ENR</b> <b>GKNR</b> STK <b>KIIR</b> QQ <b>K</b>           | 9                      |
| DB07       | YSIFK <b>NR</b> G <b>KNH</b> SR <b>NNLI</b> WQQI                  | 12                     |
| DB08       | NRILKNR <b>GEK</b> HSTKNILWQ <b>EI</b>                            | 3                      |
| DB09       | NRILKNRDEKRSTK <b>KIIR</b> QQ <b>K</b>                            | 4                      |
| DB10       | NRIL <b>ENR</b> <b>GEKR</b> STK <b>KMIR</b> QQI                   | 6                      |
| DB11       | Y <b>SSF</b> K <b>NR</b> G <b>QNH</b> SR <b>NNLI</b> WQQI         | 13                     |
| DB12       | YRIL <b>ENR</b> <b>GEQR</b> STK <b>KIIR</b> QQ <b>K</b>           | 8                      |
| DB13       | YRIL <b>ENR</b> <b>GEQR</b> STK <b>KIIR</b> PQ <b>K</b>           | 9                      |
| DB14       | NRIL <b>ENR</b> <b>GEK</b> HSTKNILWQQI                            | 3                      |
| DB15       | NSILK <b>NR</b> G <b>KNH</b> TRKNIWQQI                            | 9                      |
| DB16       | NRIL <b>ENR</b> <b>GEQR</b> STK <b>KIIR</b> PQ <b>K</b>           | 8                      |
| DB17       | Y <b>SSF</b> N <b>NR</b> G <b>QNH</b> SR <b>NNLI</b> WQQI         | 14                     |
| DB18       | YSILK <b>NR</b> G <b>TNH</b> SR <b>NNII</b> WQQI                  | 10                     |
| DB19       | NSIL <b>ENR</b> <b>GKNR</b> STK <b>KIIR</b> QQI                   | 8                      |
| DB20       | NRILKNR <b>GEKR</b> STKNILWQQI                                    | 1                      |
| DB21       | NRIL <b>ENR</b> <b>GEQR</b> STK <b>KIIR</b> QQ <b>K</b>           | 6                      |
| DB22       | YRIL <b>ENR</b> <b>GEKR</b> STK <b>KMIR</b> QQ <b>K</b>           | 8                      |
| DB23       | Y <b>SSF</b> N <b>NR</b> G <b>QNH</b> SR <b>NNRI</b> WQQ <b>K</b> | 15                     |
| DB24       | Y <b>SSF</b> N <b>NR</b> G <b>QNH</b> SR <b>NNRI</b> WQQI         | 14                     |
| DB25       | YSIFK <b>NR</b> G <b>QNH</b> SR <b>NNII</b> WQQ <b>K</b>          | 12                     |
| DB26       | YSIFK <b>NR</b> GK <b>THSR</b> NNIWPQI                            | 12                     |
| DB27       | YSIFK <b>NR</b> G <b>KNH</b> SR <b>NNII</b> WQQI                  | 11                     |
| DB28       | NSILK <b>NR</b> G <b>KNH</b> TRKNIWQQ <b>K</b>                    | 9                      |
| DB29       | NSILK <b>NR</b> G <b>KNH</b> STKNILWQQI                           | 6                      |
| DB30       | NSIL <b>ENR</b> <b>GKNR</b> STK <b>KIIR</b> PQ <b>K</b>           | 10                     |
| DB31       | NRILKNR <b>GEKR</b> STKNIL <b>R</b> QQ <b>K</b>                   | 3                      |
| DB32       | NRIF <b>KDR</b> G <b>KNH</b> STK <b>KIIR</b> QQI                  | 10                     |
| DB33       | Y <b>SSF</b> N <b>NR</b> G <b>QNH</b> SR <b>NNLI</b> WPQI         | 15                     |
| DB34       | Y <b>SSF</b> K <b>NR</b> G <b>QNH</b> SR <b>NNRI</b> WQQI         | 13                     |
| DB35       | Y <b>SSF</b> K <b>NR</b> G <b>QNH</b> SR <b>NNRI</b> WPQ <b>K</b> | 15                     |
| DB36       | Y <b>SSF</b> K <b>NR</b> G <b>QNH</b> SR <b>NNLI</b> WPQI         | 14                     |
| DB37       | YSILK <b>NR</b> G <b>KNR</b> STKNILWPQ <b>K</b>                   | 7                      |
| DB38       | YSILK <b>NR</b> G <b>KNH</b> SR <b>NNLI</b> WQQI                  | 11                     |
| DB39       | YSILK <b>NR</b> G <b>KNH</b> SR <b>NNII</b> WPQI                  | 11                     |
| DB40       | YSILK <b>NR</b> <b>GEKR</b> STKNIL <b>RP</b> QI                   | 5                      |
| DB41       | YSIL <b>ENR</b> <b>GKNR</b> STK <b>KIIR</b> QQI                   | 8                      |
| DB42       | YSIL <b>ENR</b> <b>GEQR</b> STK <b>KII</b> WQQ <b>K</b>           | 8                      |

|      |                                                         |    |
|------|---------------------------------------------------------|----|
| DB43 | YSIFN <b>NR</b> GQNHSRNNI <b>W</b> QQI                  | 12 |
| DB44 | YSIFK <b>NR</b> GQNHSRNNLI <b>W</b> QQI                 | 12 |
| DB45 | YSIFK <b>NR</b> GQNHSRNNI <b>W</b> QQI                  | 11 |
| DB46 | YSIFK <b>NR</b> GKTHSRNNI <b>W</b> QQK                  | 12 |
| DB47 | YSIFK <b>NR</b> GK <b>NR</b> SRNNLI <b>W</b> QQI        | 9  |
| DB48 | YRILK <b>NR</b> GEKHSTKNIL <b>W</b> QQK                 | 4  |
| DB49 | YRILE <b>NR</b> GEKRSTK <b>KMIR</b> QQI                 | 7  |
| DB50 | YRIFK <b>NR</b> GKTHSRNNI <b>W</b> QQI                  | 10 |
| DB51 | YRIFK <b>NR</b> GKQH <b>SR</b> KNI <b>W</b> QQK         | 9  |
| DB52 | N <b>SS</b> F <b>NR</b> GQNHSRNNLI <b>W</b> QQI         | 14 |
| DB53 | NSILK <b>NR</b> GKTHSRNNI <b>W</b> QQI                  | 8  |
| DB54 | NSILK <b>NR</b> GK <b>NR</b> RSTK <b>KIIR</b> QQI       | 7  |
| DB55 | NSILK <b>NR</b> GK <b>NH</b> TRKNI <b>W</b> QE <b>I</b> | 10 |
| DB56 | NSILK <b>NR</b> GK <b>NH</b> STKN <b>ML</b> WQQI        | 6  |
| DB57 | NSILK <b>NR</b> GEKHSTKNIL <b>W</b> QQI                 | 3  |
| DB58 | NSILE <b>NR</b> GEKHSTKNI <b>IR</b> QQI                 | 6  |
| DB59 | NSIFK <b>NR</b> GKTHSRNNI <b>W</b> QQI                  | 9  |
| DB60 | NR <b>S</b> LE <b>NR</b> GEQRST <b>NKIIR</b> QQI        | 8  |
| DB61 | NRILK <b>NR</b> GK <b>NR</b> RSTKNI <b>W</b> QQI        | 4  |
| DB62 | NRILK <b>NR</b> GK <b>NH</b> TRKNI <b>W</b> QQI         | 8  |
| DB63 | NRILK <b>NR</b> GK <b>KR</b> RSTKNIL <b>W</b> QQI       | 2  |
| DB64 | NRILK <b>NR</b> GEQRSTKNIL <b>W</b> QQI                 | 2  |
| DB65 | NRILK <b>NR</b> GEQRSTK <b>KIIRP</b> QK                 | 7  |
| DB66 | NRILK <b>NR</b> GEKRSTKNI <b>W</b> QQI                  | 2  |
| DB67 | NRILK <b>NR</b> GEKRSTK <b>KMI</b> WQQI                 | 4  |
| DB68 | NRILK <b>NR</b> GEKRSTK <b>KMIR</b> QQI                 | 5  |
| DB69 | NRILK <b>NR</b> GEKRSTK <b>KIIR</b> QQI                 | 4  |
| DB70 | NRILK <b>NR</b> GEKHSTKNIL <b>WP</b> QK                 | 4  |
| DB71 | NRILK <b>NR</b> DEQRSTK <b>KIIR</b> QQI                 | 4  |
| DB72 | NRILK <b>NR</b> DE <b>N</b> RSTKNI <b>IR</b> QQI        | 3  |
| DB73 | NRILK <b>NR</b> DEKRSTKNIL <b>W</b> QQK                 | 1  |
| DB74 | NRILK <b>NR</b> DEKRSTK <b>KIIRP</b> QI                 | 4  |
| DB75 | NRILK <b>NR</b> DEKHSTKNIL <b>W</b> QQK                 | 2  |
| DB76 | NRILK <b>NR</b> DEKHSTKNI <b>IR</b> QQI                 | 3  |
| DB77 | NRILK <b>DR</b> DE <b>QH</b> STKNIL <b>R</b> QQI        | 4  |
| DB78 | NRILK <b>DR</b> DEKRSTK <b>KIIR</b> QQI                 | 4  |
| DB79 | NRILE <b>NR</b> GQ <b>NR</b> RSTKNI <b>IR</b> QQI       | 6  |
| DB80 | NRILE <b>NR</b> GEQRST <b>NKIIRP</b> QK                 | 9  |
| DB81 | NRILE <b>NR</b> GEQRSTK <b>KIL</b> WQQI                 | 4  |
| DB82 | NRILE <b>NR</b> GEQRSTK <b>KILR</b> QQK                 | 6  |
| DB83 | NRILE <b>NR</b> GEKRSTK <b>KMLR</b> QQI                 | 5  |
| DB84 | NRILE <b>NR</b> GEKRSTK <b>KIIR</b> QQI                 | 4  |
| DB85 | NRILE <b>NR</b> G <b>EKH</b> STK <b>KMIR</b> QQI        | 8  |
| DB86 | NRIFK <b>NR</b> GK <b>KH</b> SRNNLI <b>W</b> QQI        | 9  |

|      |                                                 |    |
|------|-------------------------------------------------|----|
| DB87 | NRIFK <b>DRGKNH</b> STK <b>KIIR</b> QQK         | 8  |
| DB88 | NRIF <b>KDRDKQH</b> STK <b>KI</b> WQQI          | 8  |
| DB89 | NRIF <b>ENR</b> <b>GKNH</b> STK <b>KIIR</b> QQI | 10 |
| DB90 | NRIF <b>ENRGE</b> QRSTK <b>KIIR</b> QQI         | 6  |

---

PvDBP-II gene haplotypes. Characters in bold represent amino acids resulting from non-synonymous (red) and synonymous (blue) substitutions observed in their respective nucleotide sequence compared to Salvador 1 (Sal-1) strain PvDBP-II gene sequence PVX\_110810.
